# Supplementary material for: Characterization of Putative Sporulation and Germination Genes in Clostridium perfringens Food-Poisoning Strain SM101
Source: MDPI journal article supplement (doi:10.3390/microorganisms10081481), 2022-07-22
Supplement: s1 [file s1]

## Supplementary Data

**Supplementary Table S1.** *C. perfringens* strains used in this study.

| Strains          | Relevant characteristic(s)                                                                                                                             | Reference  |
|------------------|--------------------------------------------------------------------------------------------------------------------------------------------------------|------------|
| SM101            | Wild-type strain; a transformable derivative of NCTC8798, a food-poisoning type F <i>C. perfringens</i> human strain; carries a chromosomal <i>cpe</i> | [1]        |
| IH101            | $\Delta spo0A$ ( <i>spo0A::catP</i> ) mutant of SM101                                                                                                  | [2,3]      |
| NM101            | $\Delta sigE$ ( <i>sigE::catP</i> ) mutant of SM101                                                                                                    | [4]        |
| PKT136           | $\Delta ylmC$ ( <i>ylmC::ermB</i> ) mutant of SM101                                                                                                    | This study |
| PKT137           | $\Delta bkdR$ ( <i>bkdR::ermB</i> ) mutant of SM101                                                                                                    | This study |
| PKT139           | $\Delta yyaC1$ ( <i>yyaC1::ermB</i> ) mutant of SM101                                                                                                  | This study |
| PKT140           | $\Delta yyaC2$ ( <i>yyaC2::ermB</i> ) mutant of SM101                                                                                                  | This study |
| PKT141           | $\Delta ytaF$ ( <i>ytaF::ermB</i> ) mutant of SM101                                                                                                    | This study |
| PKT142           | $\Delta ytxC$ ( <i>ytxC::ermB</i> ) mutant of SM101                                                                                                    | This study |
| SM101(pPKT2)     | Wild-type strain carrying <i>P<sub>ylmC</sub>-gusA</i> fusion                                                                                          | This study |
| SM101(pPKT6)     | Wild-type strain carrying <i>P<sub>bkdR</sub>-gusA</i> fusion                                                                                          | This study |
| SM101(pPKT10)    | Wild-type strain carrying <i>P<sub>ytaF</sub>-gusA</i> fusion                                                                                          | This study |
| SM101(pPKT12)    | Wild-type strain carrying <i>P<sub>ytxA</sub>-gusA</i> fusion                                                                                          | This study |
| SM101(pPKT14)    | Wild-type strain carrying <i>P<sub>ytxA</sub>-gusA</i> fusion                                                                                          | This study |
| SM101(pPKT16)    | Wild-type strain carrying <i>P<sub>ytxC</sub>-gusA</i> fusion                                                                                          | This study |
| SM101(pPKT18)    | Wild-type strain carrying <i>P<sub>yyaC1</sub>-gusA</i> fusion                                                                                         | This study |
| SM101(pPKT20)    | Wild-type strain carrying <i>P<sub>yyaC2</sub>-gusA</i> fusion                                                                                         | This study |
| PKT140 (pPKT130) | $\Delta yyaC2$ mutant complemented with wild-type <i>yyaC2</i>                                                                                         | This study |
| PKT142 (pPKT125) | $\Delta ytxC$ mutant complemented with wild-type <i>ytxC</i>                                                                                           | This study |

**Supplementary Table S2.** List of primers used in this study.

| Primer name | Primer sequence (5'-3') <sup>a</sup>                                               | Gene         | Nucleotide position <sup>b</sup> | Use <sup>c</sup> |
|-------------|------------------------------------------------------------------------------------|--------------|----------------------------------|------------------|
| CPP1016     | GCA GCG <u>TCG ACT</u> ATA TAT AAC AGC AAT TTG CGT GCC                             | <i>bkdR</i>  | -383 to -358                     | GUS              |
| CPP1017     | GAC <u>GCT GCA</u> GAG TAT CTA GTG TGT GTA ATC CTA AGG                             | <i>bkdR</i>  | +31 to +55                       | GUS              |
| CPP1020     | GCA GCG <u>TCG ACG</u> GAA CCT ACT GTA TCT CAA ATA GC                              | <i>ylmC</i>  | -501 to -477                     | GUS              |
| CPP1021     | GAC <u>GCT GCA</u> GCC TTC ACT TAC ATC TAT CAC TTC C                               | <i>ylmC</i>  | +41 to +65                       | GUS              |
| CPP1018     | GCA GCG <u>TCG ACA</u> AGA AGA ATA GTA CCT TAT CTC C                               | <i>ylxY</i>  | -348 to -325                     | GUS              |
| CPP1019     | GAC <u>GCT GCA</u> GTG CCC AAT TCA CAT CAA AGG                                     | <i>ylxY</i>  | +166 to +186                     | GUS              |
| CPP1022     | GCA GCG <u>TCG ACG</u> AAG GTG AGA AAT TAG CTA GTG                                 | <i>ylzA</i>  | -441 to -419                     | GUS              |
| CPP1023     | GAC <u>GCT GCA</u> GTA AGC ATA CCT CTA TCT CTA GC                                  | <i>ylzA</i>  | +108 to +130                     | GUS              |
| CPP1033     | GCA GCG <u>TCG ACG</u> ATC ACA TAA GTA ATA GAG AAA GCC                             | <i>ytaF</i>  | -231 to -206                     | GUS              |
| CPP1034     | GAC <u>GCT GCA</u> GGT TCC TAA AGC AGA TAT GGA TGC                                 | <i>ytaF</i>  | +117 to +140                     | GUS              |
| CPP1162     | GCA GCG <u>TCG ACT</u> CTG GAT GAC CAT CTA TAG CA                                  | <i>ytxC</i>  | -262 to -241                     | GUS              |
| CPP1163     | GAC <u>GCT GCA</u> GCT GAG ATA CTT TCT GAC ACA CCA A                               | <i>ytxC</i>  | +94 to +117                      | GUS              |
| CPP1182     | GCA GCG <u>TCG ACT</u> TTT GAT GAT TCC TCC TCA GC                                  | <i>yyaCl</i> | -468 to -447                     | GUS              |
| CPP1183     | GAC <u>GCT GCA</u> GGG TAC CAA CTA ATG GAC CTA AGC A                               | <i>yyaCl</i> | +126 to +150                     | GUS              |
| CPP1184     | GCA GCG <u>TCG ACC</u> CCT GTG CTA GGT ATG CCC TT                                  | <i>yyaC2</i> | -332 to -311                     | GUS              |
| CPP1185     | GAC <u>GCT GCA</u> GAT CTC CTG TGG AGC GAT CAG A                                   | <i>yyaC2</i> | +126 to +146                     | GUS              |
| CPP1210     | AAA AAA GCT TAT AAT TAT CCT TAC AGG TCC TTG AAG TGC<br>GCC CAG ATA GGG TG          | <i>bkdR</i>  | IBS 357/358s                     | MP               |
| CPP1211     | CAG ATT GTA CAA ATG TGG TGA TAA CAG ATA AGT CCT TGA<br>AAG TAA CTT ACC TTT CTT TGT | <i>bkdR</i>  | EBS1d 357/358s                   | MP               |
| CPP1212     | TGA ACG CAA GTT TCT AAT TTC GGT TAC CTG TCG ATA GAG<br>GAA AGT GTC T               | <i>bkdR</i>  | EBS2 357/358s                    | MP               |
| CPP1207     | AAA AAA GCT TAT AAT TAT CCT TAA GAA TCT TAT CTG TGC<br>GCC CAG ATA GGG TG          | <i>ylmC</i>  | IBS 126/127s                     | MP               |
| CPP1208     | CAG ATT GTA CAA ATG TGG TGA TAA CAG ATA AGT CTT ATC<br>TAT TAA CTT ACC TTT CTT TGT | <i>ylmC</i>  | EBS1d 126/127s                   | MP               |
| CPP1209     | TGA ACG CAA GTT TCT AAT TTC GAT TAT TCT TCG ATA GAG<br>GAA AGT GTC T               | <i>ylmC</i>  | EBS2 126/127s                    | MP               |
| CPP1186     | AAA AAA GCT TAT AAT TAT CCT TAA GGG TCC TTG AAG TGC<br>GCC CAG ATA GGG TG          | <i>ytaF</i>  | IBS 98/99a                       | MP               |
| CPP1187     | CAG ATT GTA CAA ATG TGG TGA TAA CAG ATA AGT CCT TGA<br>AAA TAA CTT ACC TTT CTT TGT | <i>ytaF</i>  | EBS1d 98/99a                     | MP               |
| CPP1188     | TGA ACG CAA GTT TCT AAT TTC GAT TAC CCT TCG ATA GAG<br>GAA AGT GTC T               | <i>ytaF</i>  | EBS2 98/99a                      | MP               |
| CPP1189     | AAA AAA GCT TAT AAT TAT CCT TAG TAG ACG ATT ATG TGC<br>GCC CAG ATA GGG TG          | <i>ytxC</i>  | IBS 519/520s                     | MP               |
| CPP1190     | CAG ATT GTA CAA ATG TGG TGA TAA CAG ATA AGT CGA<br>TTA TAT TAA CTT ACC TTT CTT TGT | <i>ytxC</i>  | EBS1d 519/520s                   | MP               |
| CPP1191     | TGA ACG CAA GTT TCT AAT TTC GAT TTC TAC TCG ATA GAG<br>GAA AGT GTC T               | <i>ytxC</i>  | EBS2 519/520s                    | MP               |
| CPP1216     | AAA AAA GCT TAT AAT TAT CCT TAA CCA TCA TAG TAG TGC<br>GCC CAG ATA GGG TG          | <i>yyaCl</i> | IBS 96/97s                       | MP               |
| CPP1217     | CAG ATT GTA CAA ATG TGG TGA TAA CAG ATA AGT CAT<br>AGT ATG TAA CTT ACC TTT CTT TGT | <i>yyaCl</i> | EBS1d 96/97s                     | MP               |
| CPP1218     | TGA ACG CAA GTT TCT AAT TTC GAT TAT GGT TCG ATA GAG<br>GAA AGT GTC T               | <i>yyaCl</i> | EBS2 96/97s                      | MP               |
| CPP1219     | AAA AAA GCT TAT AAT TAT CCT TAG TAG GCC ACG TAG TGC<br>GCC CAG ATA GGG TG          | <i>yyaC2</i> | IBS 342/343s                     | MP               |
| CPP1220     | CAG ATT GTA CAA ATG TGG TGA TAA CAG ATA AGT CCA<br>CGT ACT TAA CTT ACC TTT CTT TGT | <i>yyaC2</i> | EBS1d 342/343s                   | MP               |

|         |                                                                                                               |              |                                |          |
|---------|---------------------------------------------------------------------------------------------------------------|--------------|--------------------------------|----------|
| CPP1221 | TGA ACG CAA GTT TCT AAT TTC GAT TCC TAC TCG ATA GAG<br>GAA AGT GTC T<br>CGA AAT TAG AAA CTT GCG TTC AGT AAA C | <i>yyaC2</i> | EBS2 342/343s<br>EBS Universal | MP<br>MP |
| CPP1031 | GCT TGC AAT ACT TTC TCT TAA GGT GT                                                                            | <i>bkdR</i>  |                                | Detect   |
| CPP1204 | TGA GGA AGC TGA GAT GAT GGA                                                                                   | <i>bkdR</i>  |                                | Detect   |
| CPP1092 | GCG GGT ACC CGG TAT ATC TCA AGC GCA AGT TTC                                                                   | <i>ylmC</i>  |                                | Detect   |
| CPP1094 | GCA GCG TCG ACA TCC ACG CCT TTC TCT AAG TTG                                                                   | <i>ylmC</i>  |                                | Detect   |
| CPP1194 | TGG AGG CAG AAA AAG TGA GC                                                                                    | <i>ytaF</i>  |                                | Detect   |
| CPP1195 | GGG CTA AGG ATA AGG CTA GGG                                                                                   | <i>ytaF</i>  |                                | Detect   |
| CPP1196 | TCT CAT ATG GAA CTC ACT TCG TT                                                                                | <i>ytxC</i>  |                                | Detect   |
| CPP1197 | TCC TAC TTC AGC AGC ATC TGT                                                                                   | <i>ytxC</i>  |                                | Detect   |
| CPP1182 | GCA GCG TCG ACT TTT GAT GAT TCC TCC TCA GC                                                                    | <i>yyaC1</i> |                                | Detect   |
| CPP1183 | GAC GCT GCA GGG TAC CAA CTA ATG GAC CTA AGC A                                                                 | <i>yyaC1</i> |                                | Detect   |
| CPP1202 | TCT GAT CGC TCC ACA GGA GA                                                                                    | <i>yyaC2</i> |                                | Detect   |
| CPP1203 | GCT TAA GTC TCC TAC TTC AGG CA                                                                                | <i>yyaC2</i> |                                | Detect   |
| CPP1198 | TCT GGA TGA CCA TCT ATA GCA                                                                                   | <i>ytxC</i>  |                                | CP       |
| CPP1199 | GCA GCG TCG ACG CTG TAA GGT GAG AAA CGG C                                                                     | <i>ytxC</i>  |                                | CP       |
| CPP1236 | GCG GGT ACC CCC CTG TGC TAG GTA TGC CCT T                                                                     | <i>yyaC2</i> |                                | CP       |
| CPP1237 | GCA GCG TCG ACA GCT TTC GAA GAC GTT GGA AGT                                                                   | <i>yyaC2</i> |                                | CP       |

<sup>a</sup>Restriction sites are underlined.

<sup>b</sup>Nucleotide numbering begins at the first base of the translation codon of the relevant gene.

<sup>c</sup> GUS, construction of plasmid for GUS assay; MP, construction of mutator plasmid; Detect, primers used for the detection of mutant isolates; CP, construction of complemented plasmid

**Supplementary Table S3.** List of plasmids used in this study.

| Plasmids | Relevant characteristic(s)                                                                                                            | Reference  |
|----------|---------------------------------------------------------------------------------------------------------------------------------------|------------|
| pJIR3566 | <i>C. perfringens</i> targetron plasmid derived from pJIR750ai, contains <i>ermB</i> ::RAM and <i>lacZ</i> $\alpha$ ; Cm <sup>R</sup> | [5]        |
| pMRS127  | <i>C. perfringens</i> / <i>E. coli</i> shuttle vector carrying a promoterless <i>gusA</i> ; Em <sup>R</sup>                           | [6]        |
| pJIR750  | <i>C. perfringens</i> / <i>E. coli</i> shuttle vector; Cm <sup>R</sup>                                                                | [7]        |
| pPKT1    | a 459-bp of putative promoter of <i>ylmC</i> cloned into pCR-XL-TOPO; Kan <sup>R</sup>                                                | This study |
| pPKT2    | a 459-bp of putative promoter of <i>ylmC</i> from pPKT1 cloned into pMRS127; Em <sup>R</sup>                                          | This study |
| pPKT5    | a 389-bp of putative promoter of <i>bkdR</i> cloned into pCR-XL-TOPO; Kan <sup>R</sup>                                                | This study |
| pPKT6    | a 389-bp of putative promoter of <i>bkdR</i> from pPKT5 cloned into pMRS127; Em <sup>R</sup>                                          | This study |
| pPKT9    | a 435-bp of putative promoter of <i>ytaF</i> cloned into pCR-XL-TOPO; Kan <sup>R</sup>                                                | This study |
| pPKT10   | a 435-bp of putative promoter of <i>ytaF</i> from pPKT3 cloned into pMRS127; Em <sup>R</sup>                                          | This study |
| pPKT11   | a 321-bp of putative promoter of <i>ylxY</i> cloned into pCR-XL-TOPO; Kan <sup>R</sup>                                                | This study |
| pPKT12   | a 321-bp of putative promoter of <i>ylxY</i> from pPKT3 cloned into pMRS127; Em <sup>R</sup>                                          | This study |
| pPKT13   | a 523-bp of putative promoter of <i>ylzA</i> cloned into pCR-XL-TOPO; Kan <sup>R</sup>                                                | This study |
| pPKT14   | a 523-bp of putative promoter of <i>ylzA</i> from pPKT3 cloned into pMRS127; Em <sup>R</sup>                                          | This study |
| pPKT15   | a 478-bp of putative promoter of <i>ytxC</i> cloned into pCR-XL-TOPO; Kan <sup>R</sup>                                                | This study |
| pPKT16   | a 478-bp of putative promoter of <i>ytxC</i> from pPKT3 cloned into pMRS127; Em <sup>R</sup>                                          | This study |
| pPKT17   | a 456-bp of putative promoter of <i>yyaC1</i> cloned into pCR-XL-TOPO; Kan <sup>R</sup>                                               | This study |
| pPKT18   | a 456-bp of putative promoter of <i>yyaC1</i> from pPKT3 cloned into pMRS127; Em <sup>R</sup>                                         | This study |
| pPKT19   | a 321-bp of putative promoter of <i>yyaC2</i> cloned into pCR-XL-TOPO; Kan <sup>R</sup>                                               | This study |
| pPKT20   | a 321-bp of putative promoter of <i>yyaC2</i> from pPKT3 cloned into pMRS127; Em <sup>R</sup>                                         | This study |
| pPKT121  | a 350-bp group-II intron retargeted to <i>ytaF</i> cloned into pCR-XL-TOPO; Kan <sup>R</sup>                                          | This study |
| pPKT122  | a 350-bp group-II intron retargeted to <i>ytxC</i> cloned into pCR-XL-TOPO; Kan <sup>R</sup>                                          | This study |
| pPKT131  | a 350-bp group-II intron retargeted to <i>ylmC</i> cloned into pCR-XL-TOPO; Kan <sup>R</sup>                                          | This study |
| pPKT132  | a 350-bp group-II intron retargeted to <i>bkdR</i> cloned into pCR-XL-TOPO; Kan <sup>R</sup>                                          | This study |
| pPKT134  | a 350-bp group-II intron retargeted to <i>yyaC1</i> cloned into pCR-XL-TOPO; Kan <sup>R</sup>                                         | This study |
| pPKT135  | a 350-bp group-II intron retargeted to <i>yyaC2</i> cloned into pCR-XL-TOPO; Kan <sup>R</sup>                                         | This study |
| pPKT123  | <i>ytaF</i> intron product from pPKT121 cloned into pJIR3566 ( <i>ytaF</i> mutator plasmid); Cm <sup>R</sup>                          | This study |
| pPKT124  | <i>ytxC</i> intron product from pPKT122 cloned into pJIR3566 ( <i>ytxC</i> mutator plasmid); Cm <sup>R</sup>                          | This study |
| pPKT136  | <i>ylmC</i> intron product from pPKT131 cloned into pJIR3566 ( <i>ylmC</i> mutator plasmid); Cm <sup>R</sup>                          | This study |
| pPKT137  | <i>bkdR</i> intron product from pPKT132 cloned into pJIR3566 ( <i>bkdR</i> mutator plasmid); Cm <sup>R</sup>                          | This study |
| pPKT139  | <i>yyaC1</i> intron product from pPKT134 cloned into pJIR3566 ( <i>yyaC1</i> mutator plasmid); Cm <sup>R</sup>                        | This study |
| pPKT140  | <i>yyaC2</i> intron product from pPKT135 cloned into pJIR3566 ( <i>yyaC2</i> mutator plasmid); Cm <sup>R</sup>                        | This study |

## References

1. Zhao, Y.; Melville, S.B. Identification and characterization of sporulation-dependent promoters upstream of the enterotoxin gene (*cpe*) of *Clostridium perfringens*. *J Bacteriol* **1998**, *180*, 136-142.
2. Huang, I.H.; Waters, M.; Grau, R.R.; Sarker, M.R. Disruption of the gene (*spo0A*) encoding sporulation transcription factor blocks endospore formation and enterotoxin production in enterotoxigenic *Clostridium perfringens* type A. *FEMS Microbiol Lett* **2004**, *233*, 233-240, doi:10.1016/j.femsle.2004.02.014.
3. Huang, I.H.; Sarker, M.R. Complementation of a *Clostridium perfringens* *spo0A* mutant with wild-type *spo0A* from other *Clostridium* species. *Appl Environ Microbiol* **2006**, *72*, 6388-6393, doi:10.1128/AEM.02218-05.
4. Paredes-Sabja, D.; Sarker, N.; Sarker, M.R. *Clostridium perfringens* *tpeL* is expressed during sporulation. *Microb Pathog* **2011**, *51*, 384-388, doi:10.1016/j.micpath.2011.05.006.
5. Cheung, J.K.; Keyburn, A.L.; Carter, G.P.; Lanckriet, A.L.; Van Immerseel, F.; Moore, R.J.; Rood, J.I. The VirSR two-component signal transduction system regulates NetB toxin production in *Clostridium perfringens*. *Infect Immun* **2010**, *78*, 3064-3072, doi:10.1128/IAI.00123-10.
6. Raju, D.; Waters, M.; Setlow, P.; Sarker, M.R. Investigating the role of small, acid-soluble spore proteins (SASPs) in the resistance of *Clostridium perfringens* spores to heat. *BMC Microbiol* **2006**, *6*, 50, doi:10.1186/1471-2180-6-50.
7. Bannam, T.L.; Rood, J.I. *Clostridium perfringens*-*Escherichia coli* shuttle vectors that carry single antibiotic resistance determinants. *Plasmid* **1993**, *29*, 233-235, doi:10.1006/plas.1993.1025.
